# Supplementary material for: Evaluation of synovial angiogenesis in patients with rheumatoid arthritis using 68Ga-PRGD2 PET/CT: a prospective proof-of-concept cohort study
Source: PubMed Central journal article supplement — Ann Rheum Dis. 2014 Feb 14;73(6):1269–72. doi: 10.1136/annrheumdis-2013-204820 (PMC4033145; doi:10.1136/annrheumdis-2013-204820), 2014-02-14
Supplement: annrheumdis-2013-204820-s1.pdf [file annrheumdis-2013-204820-s1.pdf]

# Online supplementary text of the methods

## ***<sup>68</sup>Ga-PRGD2 PET/CT scanning***

The cyclic RGD peptide is modified by PEGylated dimerization to form PRGD2 and chelated with 1,4,7-triazacyclononane-1,4,7-triyltriacetic acid (NOTA).<sup>8-10</sup> <sup>68</sup>Ga-PRGD2 is synthesized on site (immediately before injection) with a radiochemical purity exceeding 97%. A Biograph 64 TruePoint TrueV PET/CT system (Siemens Medical Solutions, Erlangen, Germany) was used for scanning. For each patient, 1.85 MBq (0.05 mCi) of <sup>68</sup>Ga-PRGD2 per kilogram of body weight was injected intravenously.

## ***<sup>18</sup>F-FDG PET/CT scanning***

Patients underwent <sup>18</sup>F-FDG PET/CT from the skull base to the planta within five days of the <sup>68</sup>Ga-PRGD2 PET/CT scan. <sup>18</sup>F-FDG was produced on site using Cyclotron RDS-111 (CTI, Knoxville, TN, USA). The same PET/CT system was used for scanning. Before the examinations, each patient was asked to fast for at least 4 h. The blood glucose level of the patient was within normal limits (lower than 6.4 mmol/L) before the <sup>18</sup>F-FDG was injected at a dosage of 5.55 MBq (0.15 mCi) per kilogram of body weight.

## ***Semi-quantitative analysis***

Two blinded independent nuclear medicine experts conducted the assessment of PET/CT images and reached a consensus when there was disagreement. The same nuclear medicine physicians examined all of the images using the same standard for the final analysis. A Siemens MMWP workstation was used for post-processing. For each patient, the volume of interest (VOI) was drawn over 10 large joints (bilateral shoulders, elbows, wrists, knees, and ankle) and the maximum standardized uptake values (SUV<sub>max</sub>) were recorded.

## ***Immunohistochemical analysis***

To confirm synovial angiogenesis and  $\alpha\beta_3$ -integrin expression, we conducted an

immunohistochemical analysis of the synovia of two patients with active RA to corroborate their PET/CT findings. Cryosections (4- $\mu\text{m}$  thick) were obtained and subsequently incubated at room temperature with one of the following monoclonal antibodies: integrin  $\alpha_v\beta_3$  (clone BV3, Abcam, USA); CD34 (clone QBEnd/10, Leica Biosystems, Germany); Ki-67 (clone EP5, Epitomics, USA) and vascular endothelial growth factor (VEGF; clone EP1176Y, Biocare, USA). The samples were incubated with homologous secondary antibodies conjugated with horseradish peroxidase (HRP) and then diaminobenzidine (DAB) (K4065, DAKO, USA).

### **Statistical analysis**

The Kolmogorov-Smirnov test was conducted to evaluate the normality of continuous data. A Pearson's correlation coefficient was calculated to assess the correlation between the  $\text{SUV}_{\text{max}}$  of  $^{68}\text{Ga}$ -PRGD2 and  $^{18}\text{F}$ -FDG in the joints. The paired-sample  $t$  test was used to compare  $\text{SUV}_{\text{max}}$  before and after treatment. Finally, the correlations between changes in  $\text{SUV}_{\text{max}}$  and changes in clinical parameters were calculated using Spearman's rho test. All of the statistical analyses were performed using SPSS (version 21.0, SPSS Inc., Chicago, IL, USA), and  $p < 0.05$  was considered to be statistically significant.

**Table S1.** Demographic characteristics of the enrolled patients with RA

| No. | Gender | Age (years) | Disease duration (months) | Medication     | PET/CT follow-up |
|-----|--------|-------------|---------------------------|----------------|------------------|
| 1   | Female | 48          | 116                       | MTX, LEF, PRED | Yes              |
| 2   | Female | 26          | 46                        | MTX, LEF, PRED | Yes              |
| 3   | Male   | 57          | 5                         | MTX, NSAIDS    | Yes              |
| 4   | Female | 49          | 28                        | MTX, NSAIDS    | Yes              |
| 5   | Female | 35          | 11                        | MTX, HCQ, PRED | Yes              |
| 6   | Female | 39          | 12                        | MTX            | Yes              |
| 7   | Female | 54          | 27                        | MTX            | Yes              |
| 8   | Female | 57          | 10                        | MTX, NSAIDS    | Yes              |
| 9   | Female | 50          | 126                       | MTX            | Yes              |
| 10  | Female | 53          | 16                        | MTX, NSAIDS    | Yes              |
| 11  | Female | 27          | 29                        | MTX, PRED      | Yes              |
| 12  | Female | 38          | 8                         | ETN            | Yes              |
| 13  | Female | 54          | 27                        | MTX, NSAIDS    | No               |
| 14  | Female | 43          | 23                        | MTX, NSAIDS    | No               |
| 15  | Female | 65          | 60                        | MTX, NSAID     | No               |
| 16  | Female | 57          | 6                         | MTX, LEF, PRED | No               |
| 17  | Male   | 58          | 34                        | MTX, PRED      | No               |
| 18  | Female | 42          | 120                       | MTX            | No               |
| 19  | Female | 66          | 1                         | MTX, PRED      | No               |
| 20  | Female | 70          | 24                        | MTX            | No               |

RA, rheumatic arthritis; MTX, methotrexate; LEF, leflunomide; PRED, prednisone; NSAIDS, nonsteroidal anti-inflammatory drugs; HCQ, hydroxychloroquine; ETN, etanercept.

**Table S2.** Comparison of the accumulation of <sup>68</sup>Ga-PRGD2 and the uptake of <sup>18</sup>F-FDG in the responders and poor-responders among the patients with RA

|                                                        | Pre-treatment | Post-treatment | p      |
|--------------------------------------------------------|---------------|----------------|--------|
| <b>Responders (number of joints assessed: 90)</b>      |               |                |        |
| SUV <sub>max</sub> of <sup>68</sup> Ga-PRGD2           | 2.23 ± 1.31   | 1.32 ± 0.83    | <0.001 |
| SUV <sub>max</sub> of <sup>18</sup> F-FDG              | 2.48 ± 1.48   | 1.69 ± 0.64    | <0.001 |
| <b>Poor-responders (number of joints assessed: 30)</b> |               |                |        |
| SUV <sub>max</sub> of <sup>68</sup> Ga-PRGD2           | 1.42 ± 0.83   | 1.97 ± 0.97    | 0.002  |
| SUV <sub>max</sub> of <sup>18</sup> F-FDG              | 1.92 ± 1.10   | 2.89 ± 1.18    | 0.001  |

Data are depicted as the mean ± standard deviation. The RA patients who achieved 50% or greater improvement in cDAI or cDAI ≤ 2.8 after treatment were defined as responders; the others were classified as poor-responders.

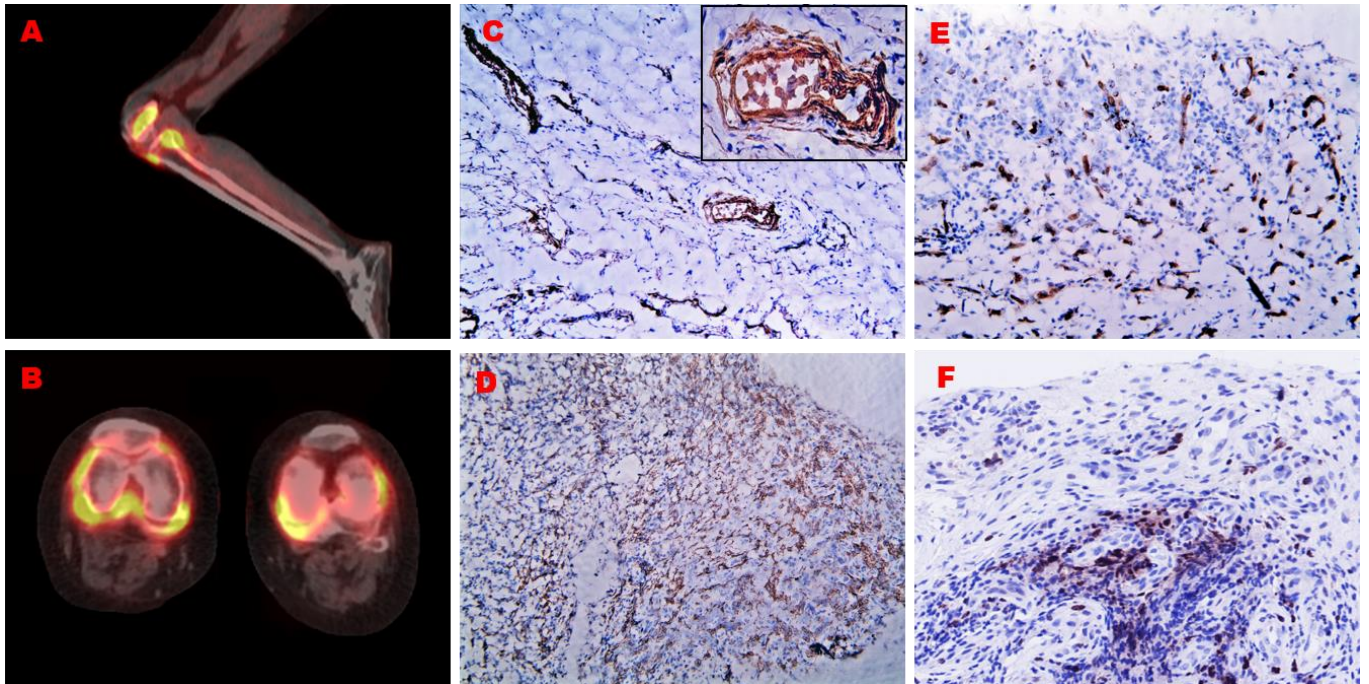

**Figure S1.**  $^{68}\text{Ga}$ -PRGD2 PET/CT images and immunohistochemical stains of the knee synovium of a patient (F, 54 y) with active rheumatoid arthritis. **A and B:** The sagittal and transaxial views using PET/CT demonstrate broad intense  $^{68}\text{Ga}$ -PRGD2 accumulation in the synovium of the inflammatory knee joint. **C:** High levels of expression of the  $\alpha_v\beta_3$ -integrin were observed in the vascular endothelial cells (the inset figure demonstrates the magnified view of a blood vessel). **D and E:** The vascular endothelial growth factor (VEGF) and CD34 stains indicate an extensive vascular network in the inflammatory synovium. **F:** Positive nuclear expression of Ki-67 indicates active proliferation. (Magnification 200 $\times$ )
